# Supplementary material
Source: publisher figshare collection journal article supplement (https://geolsoc.figshare.com/ndownloader/files/5425118)
Supplement: Supplementary file 1 [file 5425118]

Mode	Sample ID	Units	Easting	Northing	Datum	As pXRF	As SD pXRF	As AR	Co pXRF	Co SD pXRF	Co Fus	Cr pXRF	Cr SD pXRF	Cr Fus	Cu pXRF	Cu SD pXRF	Cu AR	Mn pXRF	Mn SD pXRF	Mn Fus	Ni pXRF	Ni SD pXRF	Ni AR	Pb pXRF	Pb SD pXRF	Pb AR	Rb pXRF	Rb SD pXRF	Rb Fus	S pXRF	S SD pXRF	S AR	Se pXRF	Se SD pXRF	Se AR	Sn pXRF	Sn SD pXRF	Sn AR	Sn Fus	Sr pXRF	Sr SD pXRF	Sr Fus	Th pXRF	Th SD pXRF	Th Fus	U pXRF	U SD pXRF	U AR	V pXRF
Soil	10-MPB-004	ppm	645612	6751420	NAD83	13.0	3.6	2.6	3.5	0.2	3.6	9.7	1.5	4.1	14.1	1.5	6.0	221.0	8.2	309.8	46.0	4.0	8.8	926.0	31.0	2015.4	29.6	1.2	37.4	3628	329	2700	3.9	0.4	0.3	20.3	5.9	0.3	<1	94.0	1.6	87	6.6	1.8	5.2			1.9	23.7
Soil	10-MPB-005	ppm	645621	6751434	NAD83	7.7	2.3	3.0	3.3	0.4	3.9	5.0	0.0	3.4	11.7	1.3	6.8	185.0	7.2	232.3	45.0	2.6	9.8	274.3	18.9	383.4	27.1	0.6	37.5	1598	577	800	2.4	0.3	0.2	16.0	4.6	0.3	<1	97.9	0.2	103	3.5	0.8	4.8	3.5	1.0	1.7	21.7
Soil	10-MPB-009	ppm	639594	6748120	NAD83	3.1	1.0	1.9	2.6	0.2	3.1	10.0	3.6		13.4	0.7	7.1	166.0	5.3	232.3	46.0	4.0	9.2	43.2	2.3	125.8	29.1	2.1	33.3	2108	280	900	2.2	0.5	0.4	18.7	3.2	0.2	<1	98.8	1.9	99	5.5	1.4	5.5	3.0	0.5	1.6	20.4
Soil	10-MPB-013	ppm	647694	6753406	NAD83	131.3	28.0	1.9	6.1	1.3	2.1	45.7	4.7	1.4	105.0	26.5	7.6	376.0	36.8	309.8	65.7	11.6	5.6	8155.3	1147.5	>10000	38.1	0.7	25.2	42461	3418	37500	91.3	20.8	6.2	26.3	7.1	0.9	1.0	54.5	1.9	67	44.2	4.9	4.4			6.6	41.7
Soil	10-MPB-014	ppm	647694	6753406	NAD83	103.3	41.0	2.9	8.8	1.1	5.1	41.7	2.1	2.7	61.0	6.1	10.7	405.0	16.5	387.2	30.7	14.6	12.2	7366.7	413.7	9090.7	37.1	1.7	55.3	46274	1688	11600	45.7	8.1	1.8			0.5	1.0	70.2	1.0	109	31.5	3.3	7.6			2.4	46.0
Soil	10-MPB-017	ppm	639594	6748120	NAD83	2.8	1.2	1.7	3.0	0.3	3.5	9.7	1.5	1.4	11.9	1.6	7.1	195.3	9.1	232.3	45.3	2.1	9.5	26.6	0.4	20.6	32.6	3.8	38.5			<200	2.1	0.0	0.2	18.3	5.5	0.2	<1	100.6	1.6	104	7.2	1.5	5.6	3.3	0.4	1.5	22.6
Soil	10-MPB-018	ppm	639594	6748120	NAD83	3.9	0.9	2.8	3.4	0.4	4.0	9.7	1.2	1.4	15.6	2.0	7.6	185.7	6.4	232.3	47.7	3.5	9.7	16.9	0.5	24.6	33.0	0.5	42.0			200	2.1	0.5	0.1	21.0	3.5	0.3	<1	105.6	0.9	108	5.9	1.3	5.4	3.7	0.6	1.5	24.1
Soil	10-MPB-020	ppm	643356	6751206	NAD83	5.8	2.2	1.6	3.3	0.3	4.0	8.0	3.0	1.4	13.9	2.3	5.8	203.7	5.0	309.8	48.3	1.5	8.4	158.7	15.7	200.2	35.4	1.9	41.1	2433	162	1700	3.0	0.3	0.2	22.7	6.4	0.2	<1	102.4	4.1	101	7.0	0.3	6.3	3.4	1.0	2.1	20.8
Soil	10-MPB-021	ppm	643316	6751205	NAD83	5.0	1.3	1.3	4.2	0.1	4.2	13.3	0.6	2.7	10.8	0.7	7.6	217.0	5.3	309.8	44.3	5.7	12.1	567.3	510.7	308.6	40.2	2.0	54.2	5111	380	3300	2.6	0.6	0.3	18.0	1.0	0.3	<1	93.4	1.3	98	7.8	0.2	6.7			2.3	25.3
Soil	10-MPB-023	ppm	645811	6751591	NAD83	3.1	0.5	2.6	3.2	0.1	5.0	9.0	2.6	6.2	13.4	0.8	7.0	202.0	12.1	309.8	50.3	3.2	11.5	25.9	0.6	37.4	34.6	2.0	38.8			<200	1.7	0.2	0.2	20.0	6.0	0.2	<1	102.0	3.2	102	6.5	0.7	5.0			1.7	25.3
Soil	10-MPB-024	ppm	645794	6751480	NAD83	3.1	0.6	2.6	3.0	0.1	4.7	12.3	2.5	2.1	11.5	1.0	7.3	207.3	2.1	309.8	49.0	1.0	11.0	23.2	1.0	35.3	33.2	0.8	41.3	816	85	<200	1.5	0.3	0.1	18.0	3.6	0.3	<1	103.0	0.8	104	5.8	0.5	5.7	4.3	0.8	1.7	27.9
Soil	10-MPB-025	ppm	645773	6751339	NAD83	4.2	0.6	3.3	3.3	0.2	4.4	10.7	2.1	1.4	15.4	1.9	7.7	208.3	3.1	309.8	49.3	0.6	11.1	21.4	1.8	30.0	32.2	0.7	43.2			<200	1.6	0.2	0.2	21.0	4.6	0.3	<1	102.1	2.1	103	4.4	1.6	5.6	3.7	0.2	1.6	26.5
Soil	10-MPB-026	ppm	645596	6751408	NAD83	16.7	10.0	2.2	4.0	0.4	3.4	9.3	2.1	2.1	15.2	1.8	5.8	191.7	2.1	232.3	41.7	3.2	8.3	632.3	106.5	1018.4	32.0	0.9	35.8	2574	375	1000	2.8	0.4	0.2	20.3	6.7	0.2	<1	94.9	1.5	90	6.6	0.4	5.9	2.3	0.3	1.7	24.8
Soil	10-MPB-027	ppm	645586	6751387	NAD83	4.0	0.4	2.5	4.0	0.2	4.2	10.3	1.5	2.7	13.4	1.6	6.8	206.7	2.5	232.3	44.3	4.2	9.9	38.1	1.4	64.7	36.4	0.6	41.5			200	1.8	0.3	0.2	18.7	3.1	0.3	<1	116.5	1.9	109	5.1	1.1	5.6	3.6	1.1	1.6	26.3
Soil	10-MPB-028	ppm	645579	6751398	NAD83	8.5	2.2	2.4	4.2	0.5	3.1	6.5	0.7	2.1	14.2	0.5	6.4	178.3	3.1	232.3	41.0	2.6	9.3	335.3	39.6	611.0	31.5	3.8	34.5	1405	248	300	2.4	0.3	0.2			0.2	<1	97.9	10.3	93	5.5	0.7	5.2	3.3	1.3	1.5	21.4
Soil	10-MPB-030	ppm	645582	6751412	NAD83	11.5	3.5	2.3	6.9	2.0	3.2	7.0	1.4	1.4	13.5	1.0	9.0	263.3	17.9	309.8	31.0	10.5	8.3	436.0	89.0	877.7	23.9	1.8	32.5	2350	617	600	3.1	1.2	0.3	18.3	5.1	0.3	<1	76.8	5.7	80	4.8	1.7	5.2			1.6	24.3
Soil	10-MPB-031	ppm	645594	6751421	NAD83	8.7	2.8	1.8	4.4	0.5	3.1	8.0	2.8	2.1	13.7	1.5	6.5	225.7	6.8	309.8	43.3	0.6	8.3	249.0	2.6	411.0	26.3	0.5	36.5	1932	148	500	3.6	1.0	0.3	17.7	0.6	0.3	<1	81.4	1.0	89	4.5	0.4	4.8			1.6	21.2
Soil	10-MPB-032	ppm	645592	6751445	NAD83	6.0	1.4	3.2	3.0	0.3	4.3	8.0	1.7	1.4	13.0	0.4	6.1	205.0	9.6	232.3	49.7	3.1	9.8	75.9	3.5	128.5	27.6	0.6	33.4	913	130	<200	1.9	0.6	0.2	18.0	3.6	0.2	<1	86.6	1.5	89	4.6	0.6	4.5	2.6	0.7	1.5	20.3
Soil	10-MPB-033	ppm	645592	6751445	NAD83	4.1	0.3	2.8	3.8	0.1	5.2	17.0	3.6	2.7	12.6	0.8	7.9	216.0	4.4	309.8	49.3	3.2	11.4	25.5	2.0	53.6	46.7	4.2	45.6			<200	2.1	0.6	0.1	20.3	4.2	0.3	<1	126.1	1.8	117	7.7	0.7	7.0	3.3	1.2	1.6	33.5
Soil	10-MPB-034	ppm	645592	6751445	NAD83	7.4	0.7	2.6	3.6	0.4	4.0	8.7	1.2	2.7	14.2	1.3	7.6	196.7	3.5	232.3	46.7	2.3	9.2	97.0	2.6	130.9	33.6	1.6	41.3	1344	298	<200	1.7	0.5	<0.1	19.0	4.0	0.3	<1	103.1	3.9	102	5.1	2.1	5.2	3.7	0.7	1.4	22.9
Soil	10-MPB-036	ppm	645560	6751394	NAD83	4.5	1.2	3.5	2.6	0.4	3.3	7.3	0.6		11.2	1.3	6.3	165.3	3.5	232.3	49.3	2.1	8.9	47.4	1.8	86.0	27.2	0.6	32.9			200	2.1	0.3	0.2	16.3	2.3	0.2	<1	89.8	3.1	93			4.0	3.1	0.5	1.5	21.1
Soil	10-MPB-037	ppm	645560	6751394	NAD83	5.6	1.8	2.7	3.6	1.1	4.1			2.1	41.4	49.0	6.5	191.3	35.7	232.3	68.0	38.1	9.0	45.9	2.2	48.4	28.1	1.7	36.5			<200	2.0	0.3	0.1	18.3	3.1	0.2	<1	95.9	3.0	100	5.1	1.3	5.0	3.1	0.8	1.5	115.0
Soil	10-MPB-038	ppm	645560	6751394	NAD83	3.5	0.9	2.5	3.2	0.6	4.9	5.7	0.6	2.1	13.8	1.5	7.5	165.7	2.1	232.3	51.3	1.5	10.6	17.8	2.6	35.9	35.2	0.3	40.9	999	137	<200			0.1	17.3	3.2	0.3	<1	106.1	3.0	109	5.4	2.5	5.3	2.8	0.7	1.5	23.5
Soil	10-MPB-039	ppm	645571	6751419	NAD83	18.7	2.3	3.1	3.3	0.2	3.4			1.4	11.8	0.7	5.9	164.7	5.0	232.3	43.7	1.5	9.4	482.0	14.0	145.2	28.2	1.9	34.6	2458	307	<200	2.2	0.1	0.2	16.3	0.6	0.2	<1	89.8	1.2	94	6.7	2.0	4.3	2.7	0.5	1.6	21.4
Soil	10-MPB-040	ppm	645571	6751419	NAD83	3.7	0.9	2.9	3.4	0.2	4.9	10.3	3.5	3.4	13.4	1.6	7.7	198.0	7.2	232.3	45.7	2.1	11.5	17.7	3.6	30.8	35.0	1.1	43.2	983	294	<200	2.1	0.6	0.3	13.7	4.0	0.3	<1	116.0	1.5	113	6.0	0.5	5.7	3.1	1.6	1.5	27.6
Soil	10-MPB-041	ppm	645571	6751419	NAD83	3.2	0.8	2.4	3.7	0.3	4.4	9.0	0.0	2.1	12.5	2.7	6.7	181.0	5.6	232.3	48.3	4.0	10.6	18.0	1.2	26.9	34.6	0.3	40.7			<200	1.9	0.3	0.3	18.5	6.4	0.3	<1	110.7	1.5	112	5.5	1.1	5.1	3.6	0.4	1.4	25.4
Soil	11-MPB-002	ppm	645571	6751471	NAD83	3.8	0.8	2.2	3.9	0.1	4.6	18.3	2.3	20.5	13.7	1.2	6.9	203.7	8.5	232.3	45.0	1.0	10.6	22.4	2.9	21.4	42.5	0.7	44.9	827	37	<200	1.8	0.3	0.1	20.0	6.1	0.3	<1	120.4	2.9	131	8.2	1.2	5.8	2.9	1.4	1.5	29.5
Soil	11-MPB-003	ppm	645571	6751471	NAD83	3.1	0.6	2.2	3.8	0.3	4.5	15.3	2.3	27.4	15.3	2.4	7.6	201.0	8.7	232.3	47.7	3.1	10.3	13.2	1.1	16.5	39.5	1.9	45.6			<200	2.0	0.4	0.1	21.3	5.9	0.3	<1	118.6	3.0	139	7.1	2.2	5.6	3.0	0.2	1.4	27.4
Soil	11-MPB-004	ppm	645571	6751471	NAD83	2.1	0.3	2.4	3.2	0.1	3.9	11.3	1.2	27.4	12.8	1.9	7.4	175.0	5.6	232.3	46.0	3.0	8.5	34.2	2.1	35.2	33.8	0.9	40.5			<200	2.1	0.4	0.2	16.0	5.3	0.3	<1	106.4	0.9	121	6.3	1.9	4.8	3.1	1.2	1.4	24.8
Soil	11-MPB-005	ppm	645596	6751484	NAD83	6.3	2.4	2.5	3.5	0.4	4.4	11.0	1.7	20.5	15.7	1.4	7.9	186.3	3.5	232.3	47.7	4.2	9.8	145.7	12.1	206.6	34.3	0.3	39.6	1017	241	<200	2.4	0.0	0.2	23.0	1.0	0.3	<1	105.2	13.7	113	6.0	1.2	5.4	3.5	0.8	1.5	24.1
Soil	11-MPB-006	ppm	645596	6751484	NAD83	5.1	0.6	2.2	3.5	0.3	4.3	11.7	3.1	27.4	13.8	0.5	7.2	201.7	5.1	232.3	47.3	2.5	9.8	92.1	7.4	136.3	34.2	0.6	38.8			<200	1.9	0.3	0.2	12.7	1.5	0.3	<1	98.8	4.1	111	5.6	1.6	4.9	3.4	1.2	1.4	25.2
Soil	11-MPB-007	ppm	645596	6751484	NAD83	3.6	1.2	2.4	3.7	0.3	4.2	15.3	3.5	27.4	14.9	0.8	7.7	197.7	4.2	232.3	49.0	1.7	10.4	24.8	1.1	25.8	37.1	0.8	45.7			<200	1.9	0.8	0.2	15.7	3.8	0.3	<1	121.5	1.6	140	7.1	1.5	6.1	3.4	1.2	1.7	31.8
Soil	11-MPB-008	ppm	645576	6751369	NAD83	4.9	0.5	3.5	3.0	0.1	4.2	5.0	1.7	20.5	10.8	1.2	6.0	164.7	6.4	232.3	46.3	1.2	8.7	27.2	2.2	33.9	25.3	0.5	32.3	955	246	<200	1.7	0.3	0.1	23.0	2.6	0.2	<1	91.3	2.6	108	3.5	0.3	4.1	3.0	0.2	1.5	19.3
Soil	11-MPB-009	ppm	645602	6751470	NAD83	4.9	0.6	2.3	2.7	0.3	4.0	9.0	2.0	20.5	12.6	0.9	6.9	175.7	4.0	232.3	49.0	1.0	9.3	34.3	2.1	15.4	24.6	0.8	42.1			<200	1.8	0.4	<0.1	16.7	3.1	0.2	<1	94.3	0.4	131	4.7	2.8	5.6	4.5	0.7	1.4	19.4
Soil	11-MPB-010	ppm	645602	6751470	NAD83	3.1	0.8	2.2	3.8	0.3	5.0	15.7	2.3	27.4	12.6	2.1	7.4	196.0	1.7	232.3	47.0	1.0	10.9	21.5	0.7	30.0	37.1	2.1	44.1	1061	116	<200	2.2	0.2	0.1	18.3	1.5	0.3	1.0	118.4	3.0	127	9.0	3.2	5.9	3.6	0.7	1.4	26.9
Soil	11-MPB-011	ppm	645602	6751470	NAD83	12.5	3.1	2.9	4.6	0.3	4.6	14.3	0.6		17.6	0.8	8.1	214.3	6.8	232.3	43.7	3.1	10.2	247.7	11.0	594.6	34.1	1.6	37.5	1936	441	<200	2.6	0.2	0.1	20.0	2.0	0.2	<1	99.8	2.9	107	6.4	1.7	5.6			1.6	25.2
Soil	11-MPB-012	ppm	645602	6751504	NAD83	3.7	0.2	2.2	3.7	0.2	4.7	14.3	0.6	34.2	13.1	1.5	7.2	205.7	5.9	309.8	47.0	1.0	10.4	24.6	0.3	33.4	35.7	1.0	41.9	1120	248	<200	2.1	0.4	0.1	15.7	2.5	0.3	<1	105.6	6.0	112	6.9	0.4	5.6	3.9	0.4	1.5	27.3
Soil	11-MPB-013	ppm	645602	6751504	NAD83	3.5	0.6	1.9	3.2	0.2	5.1	12.0	2.6	20.5	13.7	1.7	7.7	204.0	9.5	309.8	46.7	1.2	9.3	46.1	2.9	66.0	33.6	0.4	43.0			<200	1.5	0.6	<0.1	16.3	7.6	0.3	<1	98.7	1.4	118	4.9	1.9	5.3	3.7	1.2	1.4	24.7
Soil	11-MPB-014	ppm	645602	6751504	NAD83	3.2	0.7	2.2	3.7	0.1	4.4	13.3	3.1	20.5	15.1	0.3	7.8	205.3	2.3	232.3	44.3	4.0	9.8	26.9	1.0	32.8	33.7	1.6	43.0			<200	1.6	0.3	0.2	16.3	7.8	0.3	<1	100.1	1.1	119	5.4	0.9	5.8	2.8	1.0	1.4	26.9
Soil	11-MPB-016	ppm	645602	6751470	NAD83	3.7	1.0	2.4	3.8	0.4	4.7	16.3	3.1	27.4	14.2	1.6	7.2	215.3	10.5	232.3	47.7	4.2	11.4	22.9	0.9	21.2	39.2	1.9	44.5	1153	87	<200			0.1	19.3	7.2	0.3	<1	116.9	2.0	135	7.5	1.1	5.4	3.6	0.7	1.5	29.6
Soil	11-MPB-017	ppm	645561	6751556	NAD83	4.9	0.2	2.2	2.9	0.1	3.7	9.0	2.0		13.1	0.8	6.3	177.7	5.5	232.3	50.3	4.0	7.9	67.0	4.0	65.7	31.3	0.6	37.8	996	201	<200	1.9	0.8	0.2	14.7	5.0	0.2	<1	89.6	1.3	105	4.6	2.2	4.9			1.3	20.2
Soil	11-MPB-018	ppm	645561	6751556	NAD83	4.5	0.5	2.3	3.4	0.2	4.4	13.0	3.6	13.7	11.8	1.2	7.5	211.7	19.1	232.3	46.0	4.6	9.8	64.4	2.8	91.1	36.2	1.5	44.7	987	124	<200	1.8	0.5	0.1	16.0	2.6	0.2	<1	99.0	1.4	118	6.8		5.9	2.8	0.2	1.5	25.6
Soil	11-MPB-019	ppm	645561	6751556	NAD83	3.9	0.2	2.1	2.2	0.2	3.3	6.6	1.3		10.4	0.2	5.2	158.3	8.0	232.3	48.0	1.0	6.9	72.4	4.7	97.0	27.1	0.5	35.7	789	159	<200	2.6	0.6	0.2	17.0	8.5	0.2	<1	87.7	0.4	105	4.9	0.6	5.5	2.6	0.2	1.3	16.9
Soil	11-MPB-020	ppm	645561	6751556	NAD83	3.5	1.1	2.2	3.1	0.1	4.0	5.0	1.0	13.7	12.8	1.2	6.5	183.3	8.5	232.3	49.3	4.0	8.9	58.6	1.8	74.7	32.7	0.9	40.0	904	256	<200	1.8	0.2	<0.1	18.7	2.1	0.2	<1	95.2	2.0	109	5.0	0.3	4.7	2.9	0.3	1.4	22.7
Soil	11-MPB-021	ppm	645573	6751577	NAD83	6.1	0.6	2.3	3.2	0.1	4.2	9.7	1.2	20.5	13.6	1.5	7.5	177.7	6.7	232.3	46.7	2.5	7.9	61.7	4.8	81.0	35.6	0.5	42.6	1045	182	<200	2.1	0.6	<0.1	16.0	5.0	0.3	<1	100.1	2.5	111	5.6	1.5	5.6	2.9	0.6	1.5	25.2
Soil	11-MPB-022	ppm	645573	6751577	NAD83	5.2	0.3	2.4	3.1	0.6	4.5	11.3	1.5		13.1	2.6	7.2	187.3	14.6	232.3	49.7	0.6	9.3	49.8	8.3	77.3	33.7	2.4	44.0			<200	2.2	0.5	0.2	16.3	2.1	0.3	<1	95.5	2.7	114	5.6	0.9	5.4	2.8	1.1	1.6	21.9
Soil	11-MPB-023	ppm	645573	6751577	NAD83	4.2	0.5	2.4	3.5	0.2	5.8	9.7	1.5		12.7	0.2	7.4	187.7	1.5	232.3	48.0	0.0	9.8	57.4	2.2	82.9	33.2	1.0	43.7	864	181	<200	2.2	0.5	<0.1	17.3	1.5	0.2	<1	94.9	2.0	115	7.0	0.5	5.8	2.2	0.4	1.5	23.4
Soil	11-MPB-024	ppm	645530	6751344	NAD83	2.9	0.1	2.0	3.4	0.3	4.7	8.3	1.5	20.5	11.6	2.6	6.5	186.0	1.7	232.3	47.0	4.6	9.8	16.4	1.3	15.4	35.5	0.7	41.1	753	43	<200	1.9	0.4	0.1	19.7	4.2	0.2	<1	108.5	4.3	125	4.9	1.0	5.3	3.2	0.5	1.4	25.3
Soil	11-MPB-025	ppm	645530	6751344	NAD83	3.1	0.5	2.2	3.3	0.4	4.7	8.7	3.1		11.5	0.6	7.1	161.3	5.5	232.3	46.0	1.0	9.7	17.1	0.3	23.1	36.5	2.2	43.7			<200	1.4	0.3	0.1	16.7	4.0	0.3	<1	108.3	9.9	127	5.2	1.9	6.0	4.0	0.6	1.3	24.2
Soil	11-MPB-026	ppm	645530	6751344	NAD83	3.4	1.1	2.3	3.9	0.6	4.2	10.0	2.6	13.7	14.8	3.3	7.2	175.7	7.5	232.3	42.3	4.9	9.3	24.4	0.8	28.9	36.0	3.3	43.3	877	128	<200	2.0	0.1	0.2	18.7	4.0	0.2	<1	104.1	0.6	125	5.7	0.3	5.5			1.6	23.3
Soil	11-MPB-027	ppm	645507	6751397	NAD83	2.3	0.7	2.0	2.9	0.3	4.7	6.0	1.0	20.5	10.3	0.9	6.6	141.0	3.6	232.3	46.0	1.7	9.1	11.9	0.9	17.0	30.5	1.0	42.3			<200	1.4	0.2	<0.1	19.7	9.5	0.2	<1	105.4	2.5	128	4.6	1.0	5.4	2.7	0.5	1.4	20.8
Soil	11-MPB-028	ppm	645507	6751397	NAD83	3.9	0.5	2.4	3.5	0.4	4.8	13.0	1.0	27.4	14.4	0.6	7.5	183.3	4.6	232.3	48.3	4.0	10.9	22.1	0.7	25.2	36.8	2.1	45.0			<200			0.2	19.0	6.2	0.4	<1	114.6	2.5	136	4.6	2.1	5.8	3.9	0.8	1.5	24.6
Soil	11-MPB-029	ppm	645507	6751397	NAD83	3.5	0.5	2.1	3.6	0.4	3.8	9.7	1.5	27.4	13.3	1.0	7.1	167.7	6.0	232.3	45.0	4.0	9.8	18.9	1.1	20.0	37.3	0.8	46.0			<200	1.9	0.7	0.2	18.7	4.6	0.3	1.0	120.8	6.9	132	5.7	1.0	6.1	3.1	0.3	1.5	24.3
Soil	11-MPB-030	ppm	645527	6751416	NAD83	5.6	1.6	1.9	3.3	0.4	4.6	7.0	1.7	20.5	12.2	0.7	6.4	167.3	4.7	232.3	45.3	2.3	9.5	68.7	3.7	117.1	33.6	1.2	42.7	882	167	<200	2.0	0.7	0.2	13.3	2.9	0.2	<1	110.6	8.2	117	6.2	0.9	5.8	3.5	1.1	1.5	22.8
Soil	11-MPB-031	ppm	645527	6751416	NAD83	3.1	1.2	1.9	3.2	0.5	4.6			27.4	11.4	1.2	7.2	163.7	4.2	232.3	49.7	1.5	10.5	14.9	0.4	20.2	33.6	3.8	43.3	832	157	<200	2.2	0.3	0.3	17.3	3.2	0.3	<1	103.7	6.7	129	4.1	1.2	5.2	3.7	0.5	1.4	21.8
Soil	11-MPB-032	ppm	645527	6751416	NAD83	3.2	1.3	2.2	3.1	0.3	3.7			20.5	13.6	0.6	7.1	178.0	9.0	232.3	49.0	1.0	9.4	19.9	1.5	26.3	29.4	1.9	40.5	982	405	<200			0.1	18.0	1.0	0.3	<1	98.2	3.6	119	4.0	0.6	5.1	3.7	0.9	1.5	22.7
Soil	11-MPB-033	ppm	645511	6751486	NAD83	5.0	0.9	2.6	4.1	1.1	4.9	11.0	5.6	13.7	15.7	2.2	8.0	202.7	11.9	309.8	47.3	6.4	10.8	64.4	10.2	59.1	35.9	1.1	46.1	988	17	<200	2.2	0.4	0.1	15.0	3.6	0.2	<1	101.9	1.1	117	5.7	1.1	6.0	2.6	0.3	1.6	27.9
Soil	11-MPB-034	ppm	645511	6751486	NAD83	5.2	0.7	2.2	3.6	0.3	4.7	15.3	3.5	13.7	14.0	2.4	7.6	196.7	2.3	232.3	47.3	3.5	8.7	55.7	1.6	126.7	35.9	2.9	42.5	957	283	<200	2.3	0.8	<0.1	18.3	2.9	0.2	<1	97.5	0.6	114	8.2	2.7	5.5	3.0	0.3	1.6	25.9
Soil	11-MPB-035	ppm	645511	6751486	NAD83	3.6	0.8	2.9	3.4	0.4	5.1	13.7	0.6	13.7	13.8	1.6	7.2	194.3	4.5	232.3	49.3	6.7	9.6	42.0	2.8	60.2	36.1	0.7	44.8	738	64	<200	2.0	0.5	<0.1	18.3	1.5	0.3	<1	103.8	2.5	114	5.9	1.5	5.8	2.7	1.0	1.5	26.0
Soil	11-MPB-037	ppm	645524	6751530	NAD83	4.1	1.2	3.0	3.1	0.1	4.9	9.3	3.5	27.4	13.9	1.7	8.0	177.0	11.1	232.3	47.3	3.8	9.5	53.1	2.9	85.1	33.0	1.4	41.9	657	67	<200	2.2	0.1	0.1	19.3	4.0	0.2	<1	98.6	1.1	111	5.3	1.2	5.1	3.0	0.7	1.5	20.4
Soil	11-MPB-038	ppm	645524	6751530	NAD83	5.1	0.3	3.9	2.9	0.4	4.5	8.3	2.3		12.1	1.5	6.9	164.0	4.0	232.3	48.0	4.4	9.7	43.1	0.2	77.4	34.9	1.8	42.6	864	236	<200	2.0	0.4	0.1	17.0	3.0	0.2	<1	97.6	4.5	114	5.9	0.9	5.5	2.9	1.0	1.5	22.1
Soil	11-MPB-039	ppm	645524	6751530	NAD83	3.6	0.9	2.3	3.2	0.4	4.8	8.3	3.2	20.5	10.8	2.4	7.0	162.3	5.0	232.3	47.3	3.5	10.2	47.1	0.2	87.7	33.9	0.5	41.7			<200	1.8	0.1	0.2	18.0	2.0	0.2	<1	97.0	1.1	114			5.2	3.1	1.1	1.5	21.4
Soil	11-MPB-040	ppm	644955	6751264	NAD83	3.1	0.5	2.1	3.1	0.2	4.8	13.3	1.5	20.5	13.3	2.7	7.8	197.3	2.5	309.8	47.7	4.5	9.9	29.8	2.3	38.5	34.9	1.2	42.4	1089	249	<200	1.7	0.4	0.2	18.3	3.1	0.3	<1	98.0	2.3	113	6.1	0.5	5.4	2.7	1.0	1.5	23.3
Soil	11-MPB-041	ppm	644955	6751264	NAD83	3.5	0.6	2.1	3.3	0.6	4.5	35.7	48.0	34.2	13.9	0.8	7.3	200.7	22.0	232.3	46.7	6.4	9.6	26.4	0.9	41.3	35.8	0.2	44.8			<200	1.9	0.5	0.2	18.7	4.0	0.3	<1	97.0	1.8	115	6.2	0.3	6.1	3.0	0.3	1.5	129.7
Soil	11-MPB-042	ppm	644955	6751264	NAD83	3.8	1.1	2.0	3.3	0.3	4.4	11.0	1.7	20.5	13.8	0.8	7.2	184.0	2.0	232.3	46.3	4.9	10.1	25.6	1.8	19.4	36.0	3.0	46.2			<200	1.8	0.5	<0.1	13.7	3.2	0.3	<1	101.4	2.1	133	4.6	1.0	6.3			1.4	23.3
Soil	11-MPB-043	ppm	645290	6751358	NAD83	3.7	0.4	2.1	3.6	0.4	4.5	8.3	2.1	27.4	12.7	1.6	7.0	178.7	5.1	232.3	47.3	3.8	8.9	32.0	1.7	36.1	34.9	1.5	42.5			<200	1.6	0.3	0.2	17.3	2.1	0.3	<1	101.2	0.4	123	6.9	0.3	5.4	3.4	0.3	1.4	22.4
Soil	11-MPB-045	ppm	645013	6751404	NAD83	3.0	0.5	2.0	3.1	0.0	4.3	10.3	1.5	27.4	11.4	2.0	7.3	174.7	9.6	232.3	48.0	5.6	9.1	48.5	1.4	70.6	31.5	1.9	39.9	1090	176	<200	2.0	0.8	0.1	18.7	4.0	0.3	<1	93.9	2.7	111	3.6	0.6	5.7			1.5	21.7
Soil	11-MPB-046	ppm	645013	6751404	NAD83	4.3	1.9	2.8	3.5	0.6	4.3	7.0	1.7	27.4	11.4	1.7	7.2	171.0	5.3	232.3	43.7	1.5	8.7	52.1	11.1	95.5	28.6	0.2	41.2			<200	2.4	0.4	0.2	20.7	6.1	0.3	<1	89.0	0.8	111	5.0	0.6	5.3	2.3	0.6	1.4	22.0
Soil	11-MPB-047	ppm	645013	6751404	NAD83	3.6	0.1	1.9	3.2	0.2	4.3	8.0	1.0	20.5	13.6	2.2	7.0	192.3	11.7	232.3	46.7	5.5	9.4	55.8	3.3	67.7	32.8	1.2	42.2			<200	2.1	0.7	0.2	14.7	1.2	0.3	<1	96.6	2.6	114	7.5	0.6	5.3	2.6	0.3	1.5	20.8
Soil	11-MPB-048	ppm	645361	6751557	NAD83	4.5	1.6	2.0	3.1	0.3	4.5	6.0	2.0	20.5	15.2	1.5	6.4	162.7	3.1	232.3	44.3	4.6	8.7	33.2	0.7	46.1	30.2	1.3	40.9			<200	1.9	0.6	0.2	16.3	3.5	0.3	<1	93.2	1.6	119	5.4	1.1	5.2	3.8	0.5	1.4	21.1
Soil	11-MPB-049	ppm	645149	6751451	NAD83	3.8	0.6	2.4	3.1	0.1	4.0	8.0	1.0	27.4	13.6	1.7	8.1	167.3	4.0	232.3	45.0	4.0	11.1	36.5	0.3	64.3	32.5	2.5	41.3			<200	1.6	0.3	0.3	23.3	3.2	0.3	<1	92.6	4.3	107	5.6	1.9	5.2	3.1	0.5	1.6	19.4
Soil	11-MPB-050	ppm	645149	6751451	NAD83	3.4	1.0	2.3	2.9	0.4	5.1	8.7	2.1	20.5	11.2	0.9	7.5	170.3	1.2	232.3	46.7	3.8	9.2	35.5	2.5	79.3	30.2	0.3	42.4	898	296	<200	1.7	0.7	0.2	15.0	5.3	0.3	<1	90.6	0.7	111			5.2			1.5	22.7
Soil	11-MPB-051	ppm	645149	6751451	NAD83	3.5	0.6	2.1	2.7	0.3	4.5	7.7	2.1	20.5	10.5	1.9	7.4	180.0	2.0	309.8	46.3	2.1	9.7	32.4	0.7	56.6	30.0	1.3	41.6	782	94	<200	2.0	0.6	0.2	20.7	2.1	0.3	<1	91.5	1.6	115	5.9	0.2	4.8	3.9	0.9	1.5	21.4
Soil	11-MPB-052	ppm	645209	6751517	NAD83	3.7	1.0	2.4	3.0	0.2	I.S.	11.0	1.7		13.1	1.0	6.8	186.7	2.5	no sample	47.3	5.8	9.4	38.0	2.4	46.6	31.4	0.2	I.S.	894	98	<200			0.2	14.0	1.7	0.2	I.S.	99.8	2.6	I.S.	6.1	0.6	I.S.	3.5	0.6	I.S.	20.8
Soil	11-MPB-053	ppm	645209	6751517	NAD83	4.0	0.8	2.0	3.3	0.1	4.5			20.5	12.0	2.6	7.1	177.7	1.5	309.8	46.7	3.8	9.6	45.3	3.5	48.6	31.6	1.4	42.5			<200	2.0	0.9	0.3	18.7	2.5	0.3	<1	93.8	2.4	117	7.8	1.7	5.2	2.9	0.5	1.5	22.2
Soil	11-MPB-054	ppm	645209	6751517	NAD83	5.3	1.5	2.0	3.6	0.2	4.7	13.3	2.1	13.7	12.0	1.5	7.5	203.3	9.2	232.3	47.3	1.2	11.0	46.9	15.9	31.1	36.3	2.2	44.3	1019	450	<200			0.3	17.3	2.9	0.3	<1	110.3	2.1	131	6.6	2.2	5.7	2.8	0.3	1.5	26.7
Soil	11-MPB-055	ppm	645648	6751674	NAD83	4.1	1.6	1.8	4.2	0.2	5.3	18.3	2.1	20.5	14.1	1.0	7.8	214.3	5.1	309.8	48.0	5.6	11.4	28.6	8.3	33.2	48.3	1.3	52.9	1797	217	1000	2.0	0.4	0.2	17.0	3.0	0.3	<1	113.8	2.7	129	7.7	2.7	7.1	3.8	0.5	1.8	36.0
Soil	11-MPB-056	ppm	645648	6751674	NAD83	4.0	1.0	2.2	3.1	0.1	3.2	7.0	0.0	20.5	13.5	2.2	6.0	195.0	21.7	232.3	49.3	4.6	9.6	23.9	1.4	25.9	30.2	1.2	38.4	1223	475	<200	2.0	0.2	<0.1	15.7	4.7	0.2	<1	99.0	0.7	115	5.2	0.8	5.5			1.5	22.4
Soil	11-MPB-057	ppm	645648	6751674	NAD83	2.5	0.9	2.3	3.6	0.5	4.2	11.0	1.0	41.1	13.8	0.7	7.0	156.7	14.2	232.3	48.0	2.6	10.6	18.2	1.4	23.5	44.2	4.9	47.9	848	104	<200			<0.1			0.3	<1	111.8	3.1	139	7.3	0.9	6.2			1.6	25.2
Soil	11-MPB-058	ppm	342900	6762827	NAD83	3.2	0.8	3.2	6.8	0.7	8.3	34.7	2.9	54.7	22.4	2.9	17.3	273.0	6.2	387.2	41.0	4.4	19.2	11.5	1.2	10.6	78.5	3.2	94.0	637	180	<200			<0.1	18.3	6.0	0.6	2.0	134.7	1.7	159	13.6	1.7	12.3			2.3	58.7
Soil	11-MPB-059	ppm	611634	6737026	NAD83	4.4	1.6	1.9	4.0	0.2	4.7	10.0	1.0	13.7	14.2	0.3	7.6	168.7	1.5	232.3	45.0	2.6	9.6	28.0	1.4	30.0	40.6	1.2	44.3	1007	314	<200	1.6	0.1	<0.1	19.7	2.3	0.2	<1	119.1	2.1	130	8.1	1.1	5.7	3.6	0.6	1.4	29.0
Soil	11-MPB-060	ppm	612159	6739095	NAD83	3.5	0.7	2.2	3.7	0.4	3.4	10.0	5.6	13.7	12.0	0.7	5.1	170.7	8.0	232.3	51.3	3.5	10.3	69.0	2.5	81.0	39.4	0.6	45.9			<200	1.6	0.1	0.2			0.2	<1	112.5	1.2	127	6.6	1.4	6.5	3.5	0.8	1.6	26.8
Soil	11-MPB-061	ppm	626581	6743937	NAD83	3.8	0.5	1.8	3.9	0.4	5.4	14.3	1.2	27.4	13.7	1.6	7.9	198.3	6.5	309.8	49.0	1.0	12.3	24.3	0.9	38.6	43.6	0.6	52.8	1145	143	300	1.8	0.2	0.2	15.3	3.1	0.3	<1	118.8	0.6	146	9.0	1.4	6.3	2.9	0.8	1.8	29.0
Soil	11-MPB-062	ppm	628833	6741051	NAD83	2.6	0.6	2.7	3.4	0.1	2.8	11.0	1.7	20.5	15.5	0.6	5.8	177.7	3.1	232.3	49.3	2.5	7.4	14.6	0.5	57.7	38.5	1.1	32.7	1009	278	<200			0.1	16.0	6.2	0.2	<1	113.0	1.6	113	7.9	2.1	4.3	3.2	0.3	1.5	26.0
[truncated: 8 more columns]
